# Supplementary material for: Independent Association of Thyroid Dysfunction and Inflammation Predicts Adverse Events in Patients with Heart Failure via Promoting Cell Death
Source: MDPI journal article supplement (doi:10.3390/jcdd9090290), 2022-08-31
Supplement: s1 [file s1]

## Supplementary

**Table S1 Interaction analysis of NLR, TT3 and FT3.**

| Variable       | HR (95%CI)       | p-value |
|----------------|------------------|---------|
| <b>Model 1</b> |                  |         |
| TT3            | 0.51 (0.24-1.10) | 0.085   |
| NLR            | 1.17 (1.06-1.29) | 0.002   |
| TT3*NLR        | 0.89 (0.79-1.02) | 0.084   |
| <b>Model 2</b> |                  |         |
| FT3            | 0.74 (0.56-0.97) | 0.030   |
| NLR            | 1.13 (1.00-1.27) | 0.044   |
| FT3*NLR        | 0.98 (0.94-1.02) | 0.397   |

**Abbreviations:** FT3 Free triiodothyronine; NLR, Neutrophil-to-lymphocyte ratio; TT3, Total triiodothyronine. Model 1 and model 2 were adjusted for age, sex, BMI, Amiodarone and LVEF.
